# Supplementary material
Source: PubMed Central journal article supplement (PMC4700817)

## SUPPORTING INFORMATION

### Mutagenic Bypass of an Oxidized Abasic Lesion-Induced DNA Interstrand Cross-link Analogue by Human Translesion Synthesis DNA Polymerases

Wenyan Xu<sup>1</sup>, Adam Ouellette<sup>1</sup>, Souradyuti Ghosh<sup>3</sup>, Tylor C. O' Neill<sup>1</sup>, Marc M. Greenberg<sup>3</sup> and  
Linlin Zhao<sup>1,2</sup>\*

<sup>1</sup>*Department of Chemistry and Biochemistry and* <sup>2</sup>*Science of Advanced Materials Program,*  
*Central Michigan University, Mount Pleasant, Michigan 48859, USA*

<sup>3</sup>*Department of Chemistry, Johns Hopkins University, Baltimore, Maryland 21218, United States*

#### TABLE OF CONTENTS

**Table S1.** Steady-state kinetic parameters for single-base incorporation opposite the (-1) position (illustrated in Figure 1B) with a regular (Reg) or a DOB-ICL-harboring duplex (ICL).

**Figure S1.** LC-MS/MS fragmentation of pol  $\eta$ -catalyzed primer extension with an ICL-containing duplex.

**Figure S2.** Extracted ion chromatograms and LC-MS/MS fragmentation of authentic standards of full-length extension product ( $m/z$  1646.5,  $[M-3H^+]^{3-}$ ) and a product with an extra dA added at the 3'-end ( $m/z$  1751.0,  $[M-3H^+]^{3-}$ ).

**Figure S3.** Extracted ion chromatograms and LC-MS/MS fragmentation of authentic standards of two partially extended products ( $m/z$  1127.8,  $[M-3H^+]^{3-}$  and  $m/z$  1130.8,  $[M-3H^+]^{3-}$ ).

**Table S1.** Steady-state kinetic parameters for single-base incorporation at the (-1) position (illustrated in Figure 1B) with a regular (Reg) or a DOB-ICL-harboring duplex (ICL). Steady-state kinetic assays of single-nucleotide incorporation were performed at 37 °C with 60 nM 15/30-mer duplex, varying dNTP concentrations, 0.5-20 nM polymerase, 4 % (v/v) glycerol, 5 mM DTT, 50 mM NaCl, 5 mM MgCl<sub>2</sub>, and 100 μg mL<sup>-1</sup> bovine serum albumin (BSA) in 50 mM Tris-HCl (pH 7.4). Assays with pol v contained 10% glycerol and 90 mM KCl. The correct nucleotide is shown in *italic*.

| TLS pols | Template | Nucleotide  | $k_{cat}$ (min <sup>-1</sup> ) | $K_{m,dNTP}$ (μM) | $k_{cat}/K_{m,dNTP}$ (min <sup>-1</sup> μM <sup>-1</sup> ) | $f^a$                  | Decrease in efficiency relative to a regular duplex <sup>b</sup> |
|----------|----------|-------------|--------------------------------|-------------------|------------------------------------------------------------|------------------------|------------------------------------------------------------------|
| pol η    | Reg      | <i>dTTP</i> | 5.5 ± 0.5                      | 0.92 ± 0.23       | 6.0 ± 1.6                                                  |                        |                                                                  |
|          |          | dATP        | 1.4 ± 0.2                      | 28 ± 13           | (5.0 ± 2.4) × 10 <sup>-2</sup>                             | 8.3 × 10 <sup>-3</sup> |                                                                  |
|          |          | dCTP        | 0.27 ± 0.02                    | 150 ± 60          | (1.8 ± 0.7) × 10 <sup>-3</sup>                             | 3.0 × 10 <sup>-4</sup> |                                                                  |
|          |          | dGTP        | 0.33 ± 0.03                    | 160 ± 30          | (2.1 ± 0.4) × 10 <sup>-3</sup>                             | 3.5 × 10 <sup>-4</sup> |                                                                  |
|          | ICL      | <i>dTTP</i> | 4.4 ± 0.1                      | 8.4 ± 0.7         | (5.2 ± 0.5) × 10 <sup>-1</sup>                             |                        | 10-fold                                                          |
|          |          | dATP        | 0.98 ± 0.06                    | 88 ± 15           | (1.1 ± 0.2) × 10 <sup>-2</sup>                             | 2.1 × 10 <sup>-2</sup> |                                                                  |
|          |          | dCTP        | 0.32 ± 0.02                    | 130 ± 30          | (2.5 ± 0.6) × 10 <sup>-3</sup>                             | 4.8 × 10 <sup>-3</sup> |                                                                  |
|          |          | dGTP        | 0.85 ± 0.12                    | 230 ± 80          | (3.7 ± 1.4) × 10 <sup>-3</sup>                             | 7.1 × 10 <sup>-3</sup> |                                                                  |
| pol κ    | Reg      | <i>dTTP</i> | 14 ± 4                         | 0.25 ± 0.01       | 56 ± 16                                                    |                        |                                                                  |
|          |          | dATP        | 0.68 ± 0.03                    | 200 ± 30          | (3.4 ± 0.5) × 10 <sup>-3</sup>                             | 6.0 × 10 <sup>-5</sup> |                                                                  |
|          |          | dCTP        | 6.1 ± 0.3                      | 630 ± 60          | (9.7 ± 1.0) × 10 <sup>-3</sup>                             | 1.7 × 10 <sup>-4</sup> |                                                                  |
|          |          | dGTP        | 3.5 ± 0.2                      | 260 ± 50          | (1.2 ± 0.3) × 10 <sup>-2</sup>                             | 2.3 × 10 <sup>-4</sup> |                                                                  |
|          | ICL      | <i>dTTP</i> | 6.9 ± 0.6                      | 6.3 ± 1.8         | 1.1 ± 0.3                                                  |                        | 50-fold                                                          |
|          |          | dATP        | 0.049 ± 0.003                  | 360 ± 50          | (1.4 ± 0.2) × 10 <sup>-4</sup>                             | 1.3 × 10 <sup>-4</sup> |                                                                  |
|          |          | dCTP        | 0.095 ± 0.003                  | 320 ± 30          | (3.0 ± 0.3) × 10 <sup>-4</sup>                             | 2.7 × 10 <sup>-4</sup> |                                                                  |
|          |          | dGTP        | 0.022 ± 0.001                  | 290 ± 60          | (7.6 ± 1.6) × 10 <sup>-5</sup>                             | 6.9 × 10 <sup>-5</sup> |                                                                  |
| pol ι    | Reg      | <i>dTTP</i> | 8.9 ± 0.8                      | 6.1 ± 0.8         | 1.5 ± 0.3                                                  |                        |                                                                  |

|       |     |             |                     |                 |                                |                      |         |
|-------|-----|-------------|---------------------|-----------------|--------------------------------|----------------------|---------|
|       |     | dATP        | $0.23 \pm 0.01$     | $160 \pm 30$    | $(1.4 \pm 0.3) \times 10^{-3}$ | $9.3 \times 10^{-4}$ |         |
|       |     | dCTP        | $0.16 \pm 0.01$     | $590 \pm 140$   | $(2.5 \pm 0.7) \times 10^{-4}$ | $1.6 \times 10^{-4}$ |         |
|       |     | dGTP        | $0.049 \pm 0.003$   | $130 \pm 30$    | $(3.7 \pm 0.9) \times 10^{-3}$ | $2.5 \times 10^{-3}$ |         |
|       | ICL | <i>dTTP</i> | $0.28 \pm 0.01$     | $14 \pm 1$      | $(2.0 \pm 0.2) \times 10^{-2}$ |                      | 75-fold |
|       |     | dATP        | $0.051 \pm 0.001$   | $120 \pm 7$     | $(4.3 \pm 0.3) \times 10^{-4}$ | $2.2 \times 10^{-3}$ |         |
|       |     | dCTP        | $0.054 \pm 0.003$   | $1900 \pm 180$  | $(2.8 \pm 0.3) \times 10^{-5}$ | $1.4 \times 10^{-4}$ |         |
|       |     | dGTP        | $0.0070 \pm 0.0005$ | $230 \pm 50$    | $(3.0 \pm 0.7) \times 10^{-5}$ | $1.5 \times 10^{-4}$ |         |
| pol v | Reg | <i>dTTP</i> | $0.085 \pm 0.008$   | $3.2 \pm 0.6$   | $(2.7 \pm 0.6) \times 10^{-2}$ |                      |         |
|       |     | dATP        | $0.054 \pm 0.002$   | $240 \pm 30$    | $(2.3 \pm 0.3) \times 10^{-4}$ | $8.5 \times 10^{-3}$ |         |
|       |     | dCTP        | $0.092 \pm 0.008$   | $190 \pm 40$    | $(4.8 \pm 1.1) \times 10^{-4}$ | $1.8 \times 10^{-2}$ |         |
|       |     | dGTP        | $0.010 \pm 0.001$   | $440 \pm 110$   | $(2.3 \pm 0.6) \times 10^{-5}$ | $8.5 \times 10^{-4}$ |         |
|       | ICL | <i>dTTP</i> | $0.060 \pm 0.002$   | $100 \pm 10$    | $(6.0 \pm 0.7) \times 10^{-4}$ |                      | 44-fold |
|       |     | dATP        | $0.0072 \pm 0.0002$ | $74 \pm 12$     | $(9.7 \pm 1.6) \times 10^{-5}$ | 0.16                 |         |
|       |     | dCTP        | $0.013 \pm 0.001$   | $260 \pm 30$    | $(5.0 \pm 0.7) \times 10^{-5}$ | 0.083                |         |
|       |     | dGTP        | $0.0015 \pm 0.0001$ | $73 \pm 25$     | $(2.1 \pm 0.7) \times 10^{-5}$ | 0.035                |         |
| REV1  | Reg | <i>dTTP</i> | $0.062 \pm 0.005$   | $40 \pm 10$     | $(1.6 \pm 0.4) \times 10^{-3}$ |                      |         |
|       |     | dATP        | $0.010 \pm 0.001$   | $110 \pm 30$    | $(9.1 \pm 2.6) \times 10^{-5}$ | $5.7 \times 10^{-2}$ |         |
|       |     | dCTP        | $1.0 \pm 0.1$       | $2.0 \pm 0.4$   | $0.50 \pm 0.11$                | 310                  |         |
|       |     | dGTP        | $0.057 \pm 0.002$   | $140 \pm 20$    | $(4.1 \pm 0.6) \times 10^{-4}$ | 0.26                 |         |
|       | ICL | <i>dTTP</i> | $0.0073 \pm 0.0004$ | $42 \pm 8$      | $(1.7 \pm 0.3) \times 10^{-4}$ |                      | 9-fold  |
|       |     | dATP        | $0.0026 \pm 0.0001$ | $0.73 \pm 0.34$ | $(3.6 \pm 1.7) \times 10^{-3}$ | 21                   |         |
|       |     | dCTP        | $0.080 \pm 0.003$   | $3.9 \pm 0.5$   | $(2.1 \pm 0.3) \times 10^{-2}$ | 120                  |         |
|       |     | dGTP        | $0.0021 \pm 0.0001$ | $29 \pm 9$      | $(7.2 \pm 2.3) \times 10^{-5}$ | 0.42                 |         |

<sup>a</sup> Misincorporation frequency,  $f = (k_{\text{cat}}/K_{\text{m,dNTP}})_{\text{incorrect}} / (k_{\text{cat}}/K_{\text{m,dNTP}})_{\text{correct}}$ .

<sup>b</sup> Decrease in catalytic efficiency relative to an undamaged duplex is calculated from  $(k_{\text{cat}}/K_{\text{m,dNTP}})_{\text{undamaged, dTTP}} / (k_{\text{cat}}/K_{\text{m,dNTP}})_{\text{ICL, dTTP}}$ .

**Figure S1.** LC-MS/MS fragmentation of pol  $\eta$ -catalyzed primer extension with an ICL-containing duplex. A (product ions of  $m/z$  616.7, identical species as  $m/z$  1646.5 but with -6 charge) and B (product ions of  $m/z$  656.0, identical species as  $m/z$  1751.0 but with -6 charge) with product ions that matched theoretical fragmentation patterns labeled. Reactions contained 1  $\mu\text{M}$  pol  $\eta$ , 2  $\mu\text{M}$  primer-template complex; 2% (v/v) glycerol, four dNTPs (100  $\mu\text{M}$  each), 5 mM DTT, 50 mM NaCl, 5 mM  $\text{MgCl}_2$ , and 50  $\mu\text{g mL}^{-1}$  BSA in a total volume of 50  $\mu\text{L}$ .

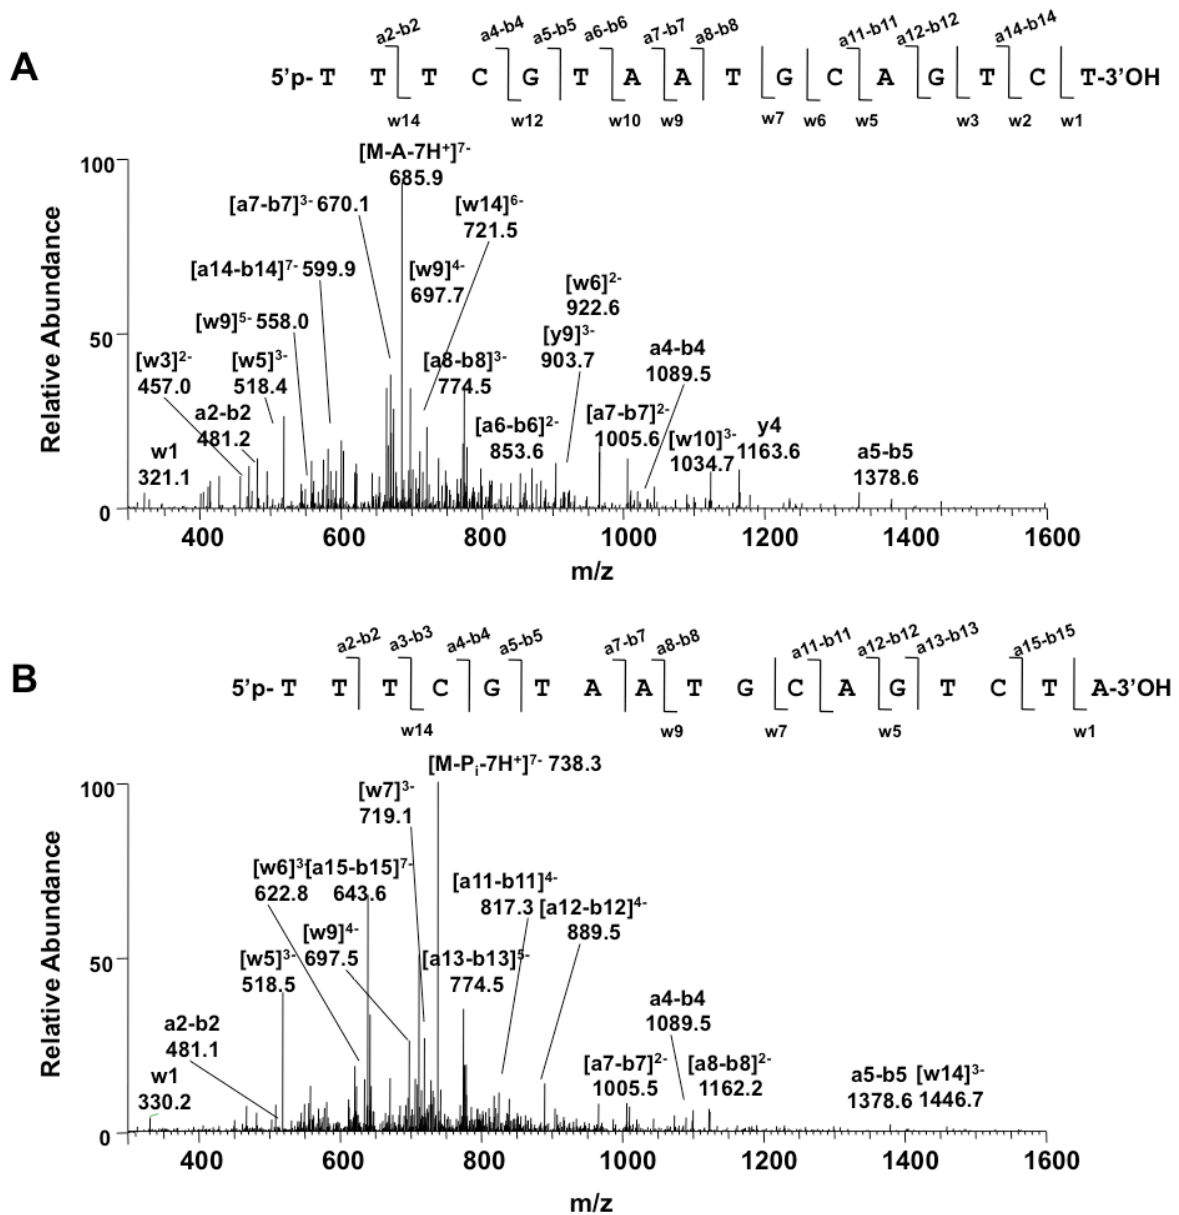

**Figure S2.** Extracted ion chromatograms (A) and LC-MS/MS fragmentation of authentic standards of full-length extension product ( $m/z$  1646.5,  $[M-3H]^+3^-$ ) and a product with an extra dA added at the 3'-end ( $m/z$  1751.0,  $[M-3H]^+3^-$ ). MS/MS fragmentation patterns are shown in B (product ions of  $m/z$  616.7, identical species as  $m/z$  1646.5 but with -6 charge) and C (product ions of  $m/z$  656.0, identical species as  $m/z$  1751.0 but with -6 charge)

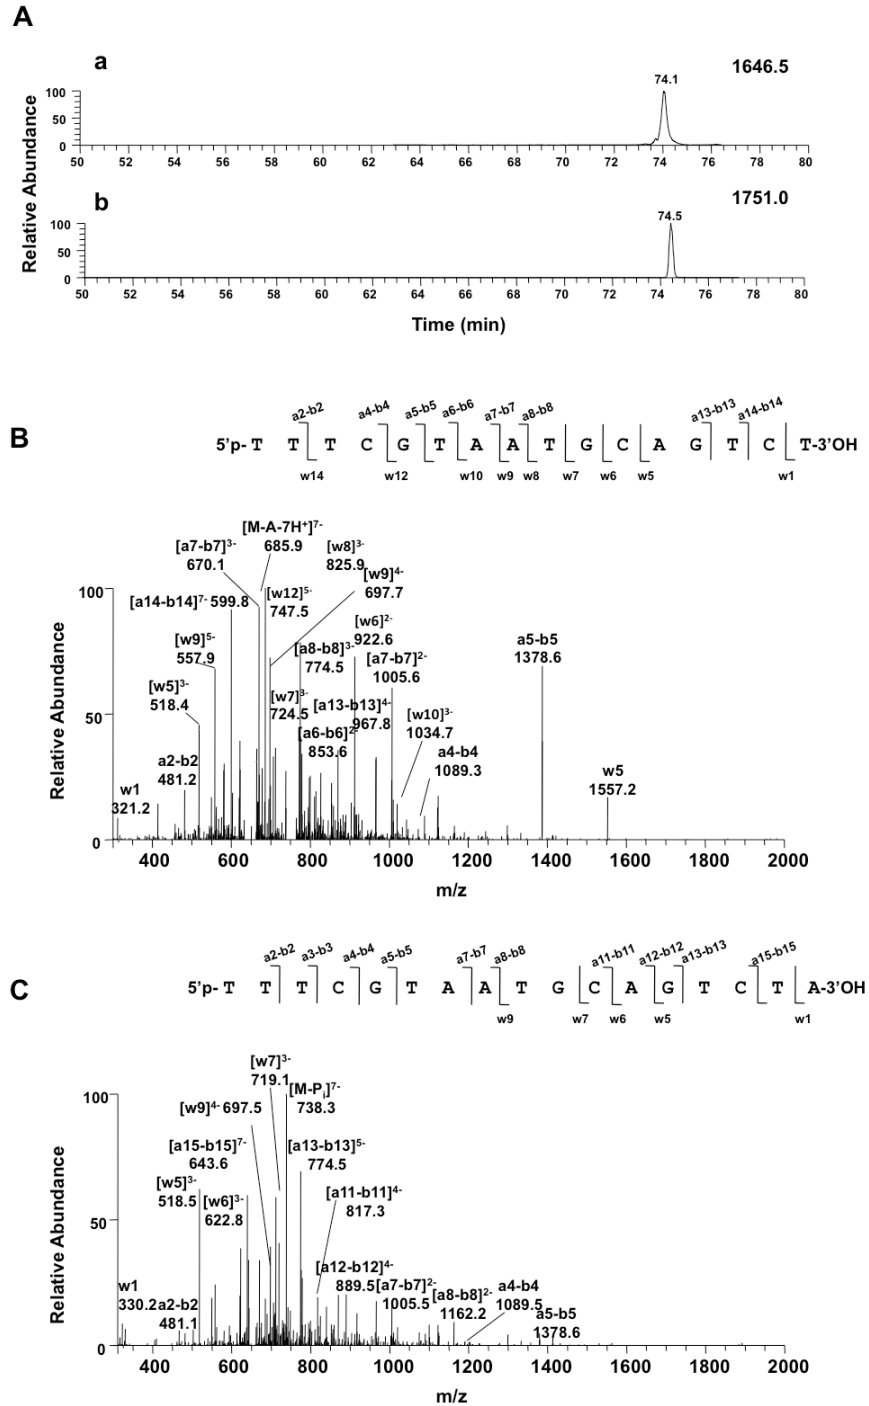

**Figure S3.** Extracted ion chromatograms and LC-MS/MS fragmentation of authentic standards of two partially extended products ( $m/z$  1127.8,  $[M-3H^+]^{3-}$  and  $m/z$  1130.8,  $[M-3H^+]^{3-}$ ). (A) Extracted ion chromatograms. (B) MS/MS fragmentation of  $m/z$  1130.8,  $[M-3H^+]^{3-}$ . (C) MS/MS fragmentation of  $m/z$  1127.8,  $[M-3H^+]^{3-}$ .

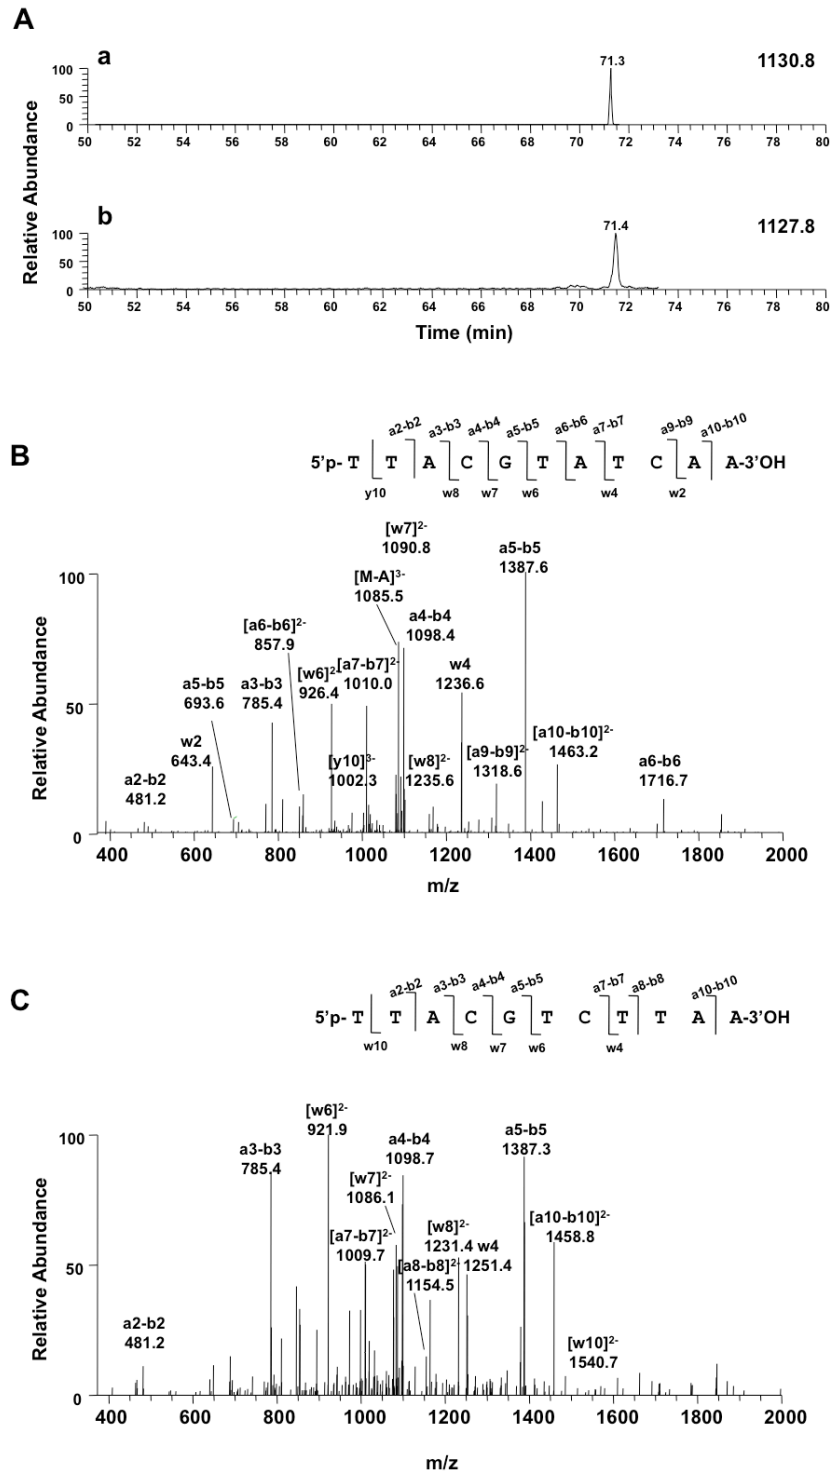

Supplement: NIHMS746407-supplement-supporting_information.pdf [file NIHMS746407-supplement-supporting_information.pdf]
